# Supplementary material for: Mutational analysis of the alpha subunit of eIF2B provides insights into the role of eIF2B bodies in translational control and VWM disease
Source: PubMed Central journal article supplement (PMC7948505; doi:10.1074/jbc.ra120.014956), 2021-01-30
Supplement: mmc1.pdf [file mmc1.pdf]

## Supporting Information

### *Mutational analysis of the alpha subunit of eIF2B provides insights into the role of eIF2B bodies in translational control and VWM disease*

Karl Norris<sup>1,#</sup>, Rachel E. Hodgson<sup>1</sup>, Tawni Dornelles<sup>2</sup>, K. Elizabeth Allen<sup>1</sup>, Ben M. Abell<sup>1</sup>, Mark P. Ashe<sup>2</sup> and Susan G. Campbell<sup>1\*</sup>.

<sup>1</sup>Biomolecular Sciences Research Centre, Sheffield Hallam University, Howard Street, Sheffield, S1 1WB, UK. <sup>2</sup>Division of Molecular and Cellular Function, Faculty of Biology, Medicine and Health, The University of Manchester, Manchester, M13 9PTUK.

#Present Address: School of Cellular and Molecular Biology, Faculty of Biological Sciences, University of Leeds, Leeds LS2 9JT UK

<sup>1</sup> and <sup>2</sup> both authors contributed equally to this work.

\* To whom correspondence should be addressed: Susan G. Campbell, Biomolecular Sciences Research Centre, Sheffield Hallam University, Howard Street, Sheffield, S1 1WB, UK; E-mail: Email: [susan.campbell@shu.ac.uk](mailto:susan.campbell@shu.ac.uk)

**Running title:** eIF2B $\alpha$  contributes to the formation of eIF2B bodies

Keywords: eIF2B, eIF2, translation initiation, VWM

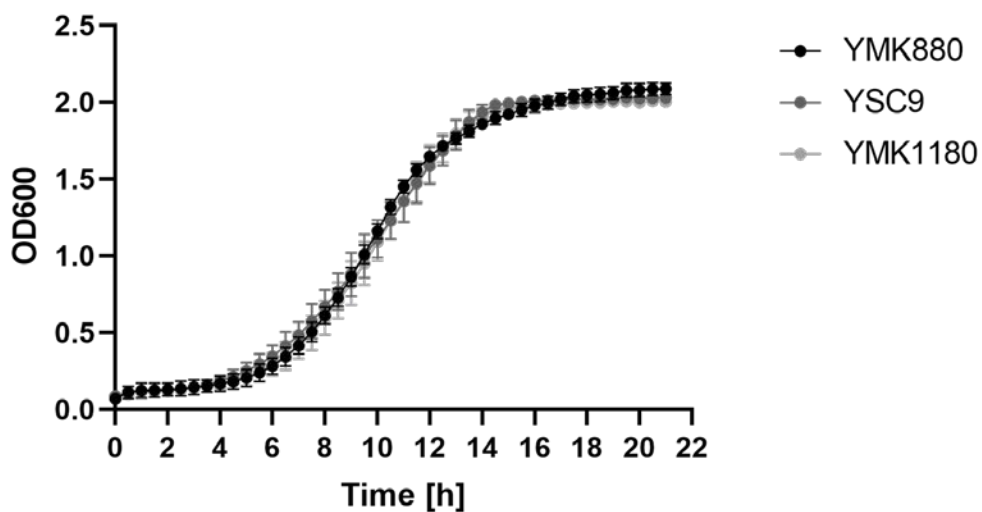

**Figure S1 – The presence of the eIF2B fusion protein does not influence the growth of different lab strains of *S. cerevisiae*.** Growth curve derived from three biological replicate cultures of the 3 *S. cerevisiae* strains containing the C-terminally GFP-tagged *GCD1* (eIF2B $\gamma$ ), W303-1A (yMK880), BY4741 (ySC9) and S288c (yMK1180). For these growth curves, three single colonies were each grown simultaneously under identical nutritional and growth conditions.

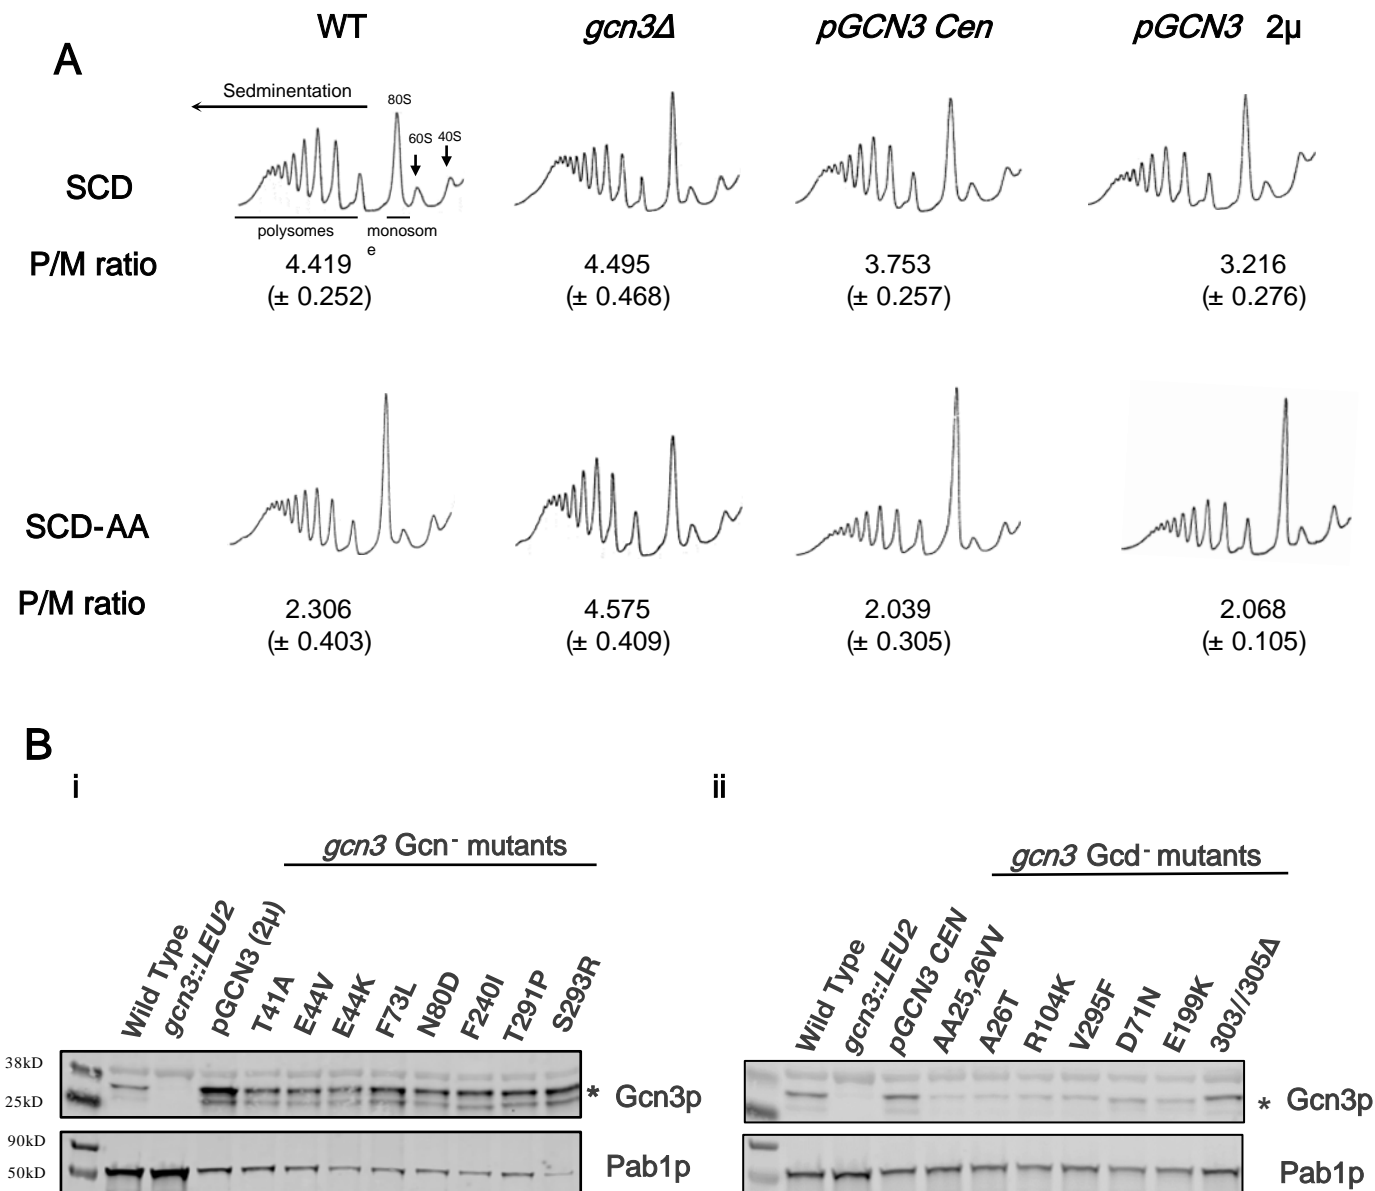

**Figure S2 – Gcn3p is required for translational regulation during amino acid starvation.** (A) Polysome analysis of the strain yMK1402 bearing (*GCD1-yeGFP gcn3::LEU2*) transformed with either a low copy Cen plasmid (*pAV1170*) or a high copy 2μ plasmid (*pAV1117*) containing WT *GCN3*. The strains were grown in selective media and incubated either in fresh media (SCD) or amino acid-free media (SCD-AA) or 15 min at 30°C. Polysome/ monosome ratios were calculated from measuring the area under the polysome peaks and dividing by the monosome peak area. Polysome analysis was as described in *Materials and Methods*. (B) Western blots were performed on protein extracts prepared from yMK880 and the strain yMK1402 (*GCD1-yeGFP gcn3::LEU2*) containing a series of (i) *Gcn<sup>-</sup>* mutants [pAV1108–13, 15 and 16] and (ii) *Gcd<sup>-</sup>* mutants [pAV1238-44 and 68]. The westerns were probed with antibodies to anti Gcn3p and anti Pab1p used as a loading control

S-3

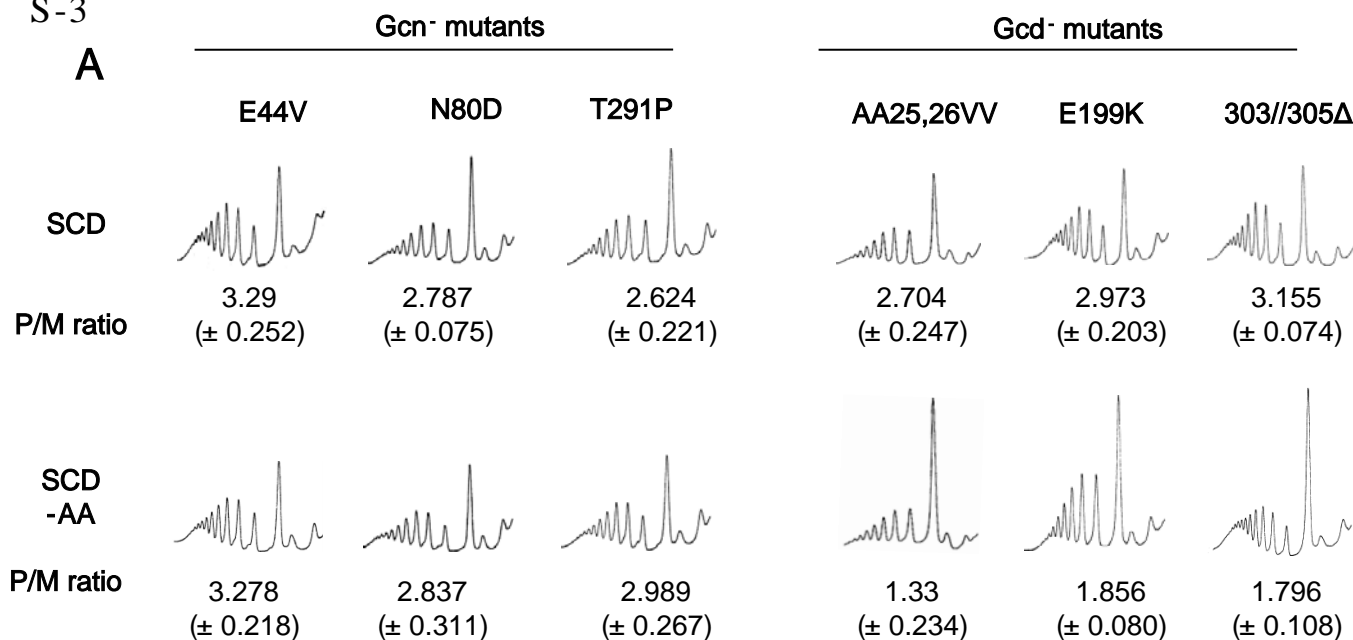**B**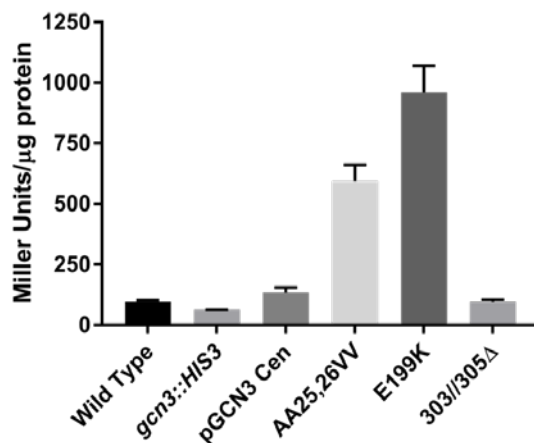

**Figure S3 – Gcn3p Gcn<sup>-</sup>/Gcd<sup>-</sup> mutants are unable to respond to amino acid stress while some gcd<sup>-</sup> mutants derepress *GCN4* and constitutively instigate a stress response.** (A) Polysome profiling of GCD1-yeGFP *gcn3::LEU2* (yMK1402) exogenously expressing Gcn<sup>-</sup> or Gcd<sup>-</sup> mutations (Gcn<sup>-</sup>: pAV1108 – 13, 15 and 16. Gcd<sup>-</sup>: pAV1238-44 and 68). The Gcn<sup>-</sup> mutations were previously generated using a high copy 2μ GCN3 plasmid (pAV1117) while the Gcd<sup>-</sup> mutations were generated using a low copy CEN GCN3 plasmid (pAV1170). The strains were grown in selective media and incubated either in fresh media (SCD) or amino acid-free media (SCD-AA) or 15 min at 30°C. Polysome/ monosome ratios were calculated from measuring the area under the polysome peaks and dividing by the monosome peak area. Polysome analysis was as described in *Materials and Methods*. (B) GCN4-LacZ assay was performed on the strain ySC86 (*GCN4-LacZ, gcn3::HIS3*) expressing wt Gcn3p (*p[GCN3 URA3 CEN]*), Gcn3p<sup>AA25,26VV</sup> (*p[GCN3(AA2526VV) URA3 CEN]*), Gcn3p<sup>E199K</sup> (*p[GCN3(E199K) URA3 CEN]*) or Gcn3p<sup>303//305Δ</sup> (*p[GCN3(303//305Δ)]*). Cultures were diluted to 0.2 OD<sub>600</sub> and incubated at 30°C with shaking until exponential growth was reached. Total protein was extracted and the β-galactosidase activity was measured to assess Gcn4p expression. Protein concentration was determined via BCA assay. n=3, error bars are representative of SD.

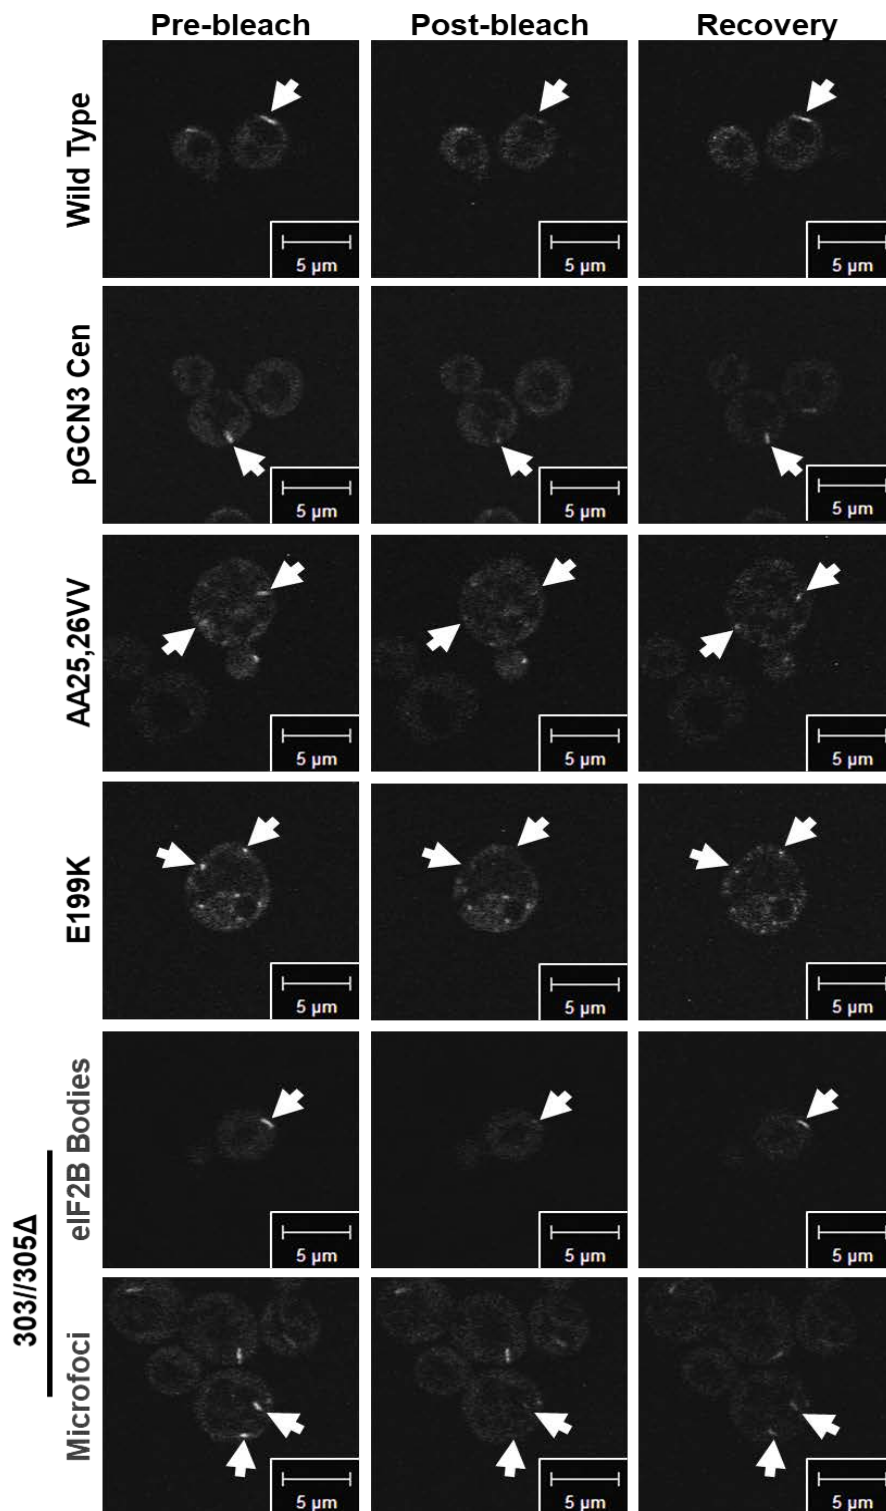

**Figure S4 – Representative images of FRAP stages for Gcn3p Gcd<sup>-</sup> mutants (see figure 5).** Cells were grown to log phase and confocal microscopy was used to FRAP analysis. Representative images of the different stages of the FRAP experiment (pre-bleach, bleach and recovery) are shown for the strain ySC16 (*SUI2-yeGFP gcn3::LEU2*) expressing WT Gcn3p (p[*GCN3 URA3 CEN6ARS4*]), Gcn3p<sup>K11E</sup> (p[*GCN3-K11E URA3CEN6ARS4*]), Gcn3p<sup>AA25,26VV</sup> (p[*GCN3-AA25,26VVURA3 CEN*]) or Gcn3p<sup>303//305Δ</sup> (p[*GCN3-303//305 URA3 CEN*]).

S-5

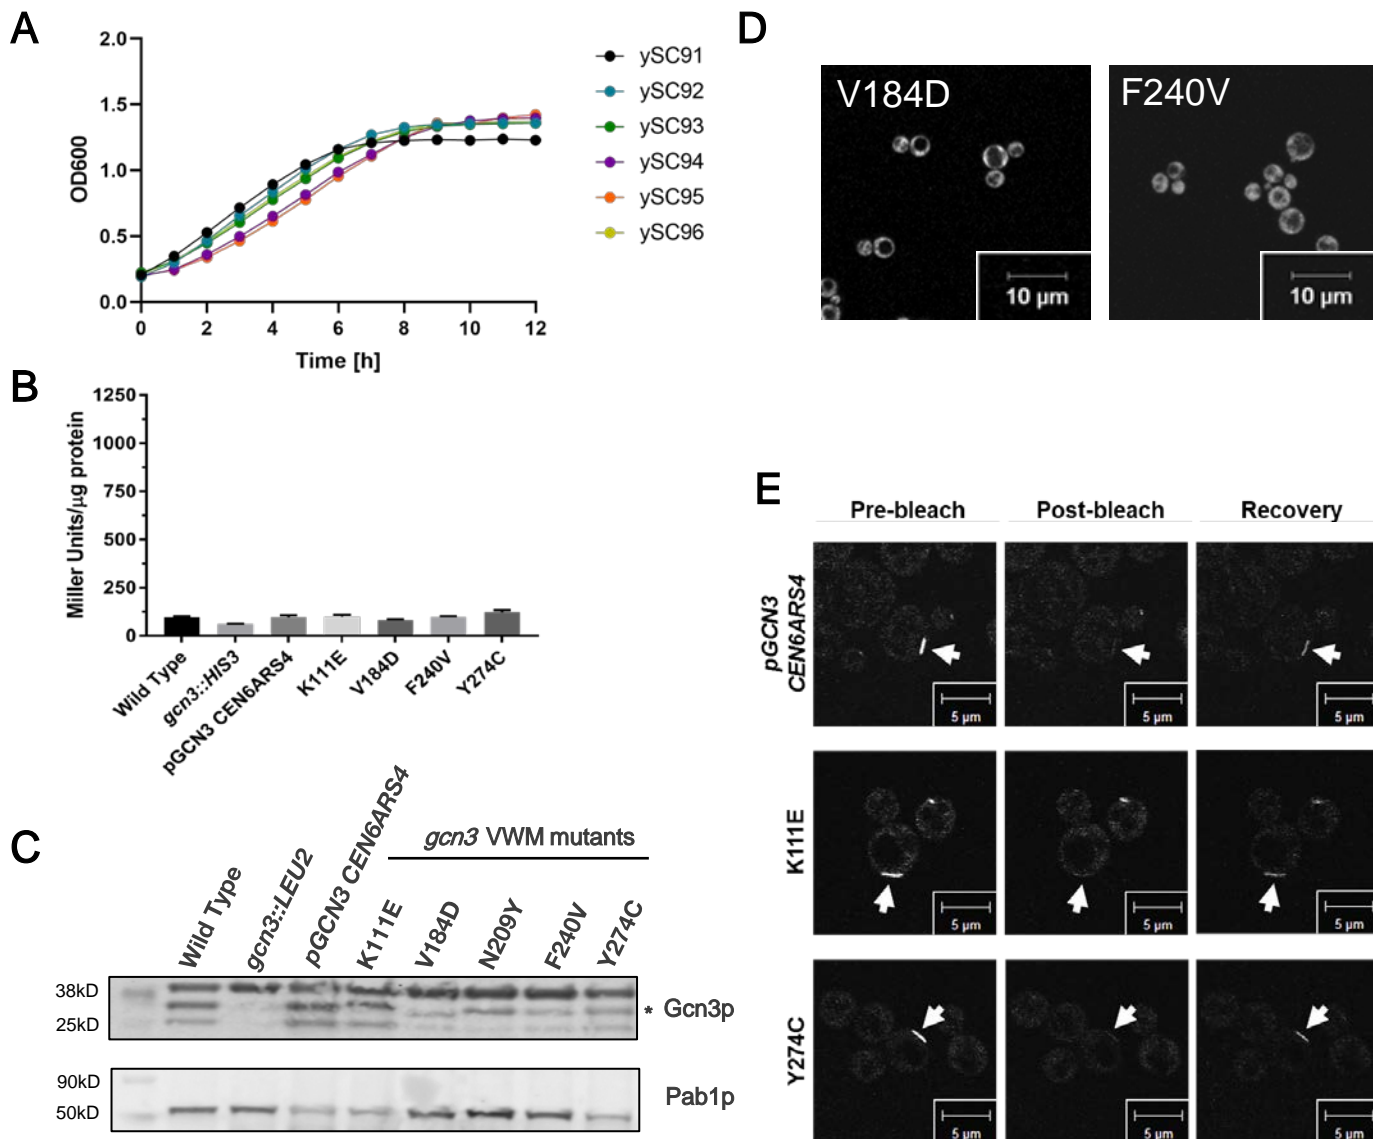

**Figure S5 – Representative Growth curves, GCN4-LacZ assays and FRAP images for VWM mutants.** (A) Growth curve derived from three biological replicate cultures of the strain yMK1402 (*GCD1-yeGFP gcn3::LEU2*) expressing *gcn3* VWM mutants, Gcn3p<sup>K111E</sup> (ySC92[*GCN3 K111E URA3 CEN6ARS4*]), Gcn3p<sup>V184D</sup> (ySC93[*GCN3 V184D URA3 CEN6ARS4*]), Gcn3p<sup>N209Y</sup> (ySC94[*GCN3 N209Y URA3 CEN6ARS4*]), Gcn3p<sup>F240V</sup> (ySC95[*GCN3 F240V URA3 CEN6ARS4*]), Gcn3p<sup>Y274C</sup> (ySC96[*GCN3 Y274C URA3 CEN6ARS4*]) and the low copy WT plasmid ySC91[*GCN3 URA3 CEN6 ARS4*]. For these growth curves, three single colonies were each grown simultaneously under identical nutritional and growth conditions. (B) GCN4-LacZ assay of four VWM *gcn3* mutants exogenously expressed in a GCN4-LacZ, *gcn3::HIS3* (ySC86) strain. Cultures were diluted to 0.2 OD600 and incubated at 30°C with shaking until exponential growth was reached. Total protein was extracted and the β-galactosidase activity was measured to assess Gcn4p expression. Protein concentration was determined via BCA assay. n=3, error bars are representative of SD (n=3). (C) Western blot to assess levels of Gcn3p in the different strains lacking Gcn3p or expressing Gcn3p endogenously or exogenously. (D) Exponential cultures of ySC9 (*SUI2-GFP gcn3::LEU2*) expressing either Gcn3p<sup>V164D</sup> (p[*GCN3-V164D URA3 CEN6*]) or Gcn3p<sup>F240V</sup> (p[*GCN3-F240V URA3 CEN6*]) VWM mutants were live-cell imaged via confocal microscopy. (E) Live-cell images of the different FRAP stages are shown for the strain ySC16 (*SUI2-yeGFP gcn3::LEU2*) containing p[WT *GCN3 URA3 CEN6ARS4*], p[*GCN3-K111E URA3CEN6ARS4*] or p[*GCN3-Y274C URA3CEN6ARS4*].
